# Supplementary material for: Supercritical fluid processing of mesoporous crystalline TiO2 thin films for highly efficient dye-sensitized solar cells
Source: Royal Society of Chemistry journal article supplement (doi:10.1039/b706569h), 2007-01-01
Supplement: b706569h.pdf [file b706569h.pdf]

## Supercritical Fluid Processing of Mesoporous Crystalline TiO<sub>2</sub> Thin Films for Highly Efficient Dye-Sensitized Solar Cells

Mingdeng Wei,<sup>a</sup> Kaixue Wang,<sup>b</sup> Masatoshi Yanagida,<sup>c</sup> Hideki Sugihara,<sup>c</sup> Michael A. Morris,<sup>b</sup> Justin D. Holmes<sup>\*b</sup>  
and Haoshen Zhou<sup>\*ac</sup>

<sup>a</sup> Japan Science and Technology Agency (JST), Light and Control Research Group, PRESTO, Kawagoe, Saitama 3320012, Japan

<sup>b</sup> Materials Section & Supercritical Fluid Centre, Department of Chemistry, University College Cork, Cork, Ireland. Fax: (+353) 21-4274097, E-mail: j.holmes@ucc.ie

<sup>c</sup> Energy Technology Research Institute, National Institute of Advanced Industrial Science and Technology (AIST), AIST Tsukuba Centre, Ibaraki 305-8568, Japan. Fax: +81-29-8615799, E-mail: hs.zhou@aist.go.jp

### Supporting information

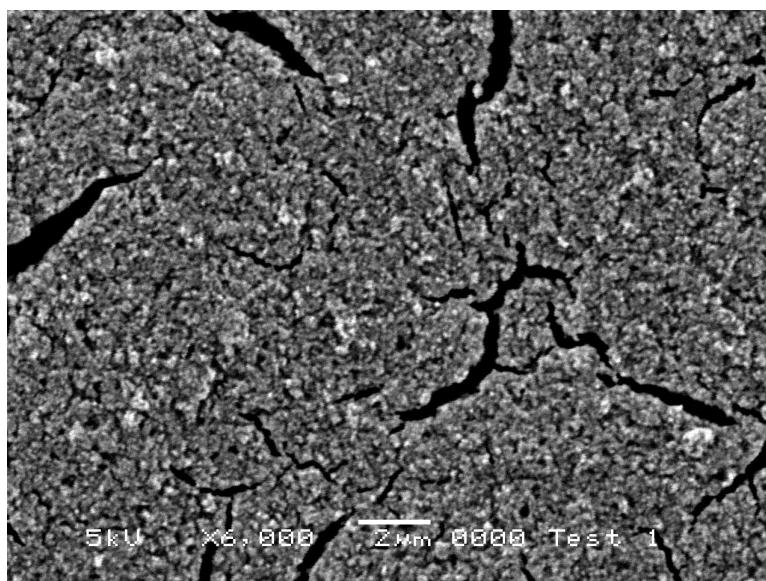

**Figure S1** SEM image of mesoporous titania film with a thickness of about 2.6 µm showing the cracked surface.
